# Supplementary material
Source: PubMed Central journal article supplement (PMC4335892)
Supplement: AAC.03504-14_zac002153642so1.pdf [file AAC.03504-14_zac002153642so1.pdf]

1 **TABLE S1 Characterization of TB patients and XDR-TB strains in China,**  
 2 **2003-2009**

3

| <b>Cluster no.</b> | <b>Strain ID</b> | <b>Year</b> | <b>Patient ID</b> | <b>Sex</b> | <b>Age</b> |
|--------------------|------------------|-------------|-------------------|------------|------------|
| <b>Cluster 1</b>   | DR5              | 2005        | P5                | F          | 26         |
|                    | DR8              | 2005        | P8                | F          | 69         |
|                    | DR10             | 2005        | P10               | M          | 26         |
|                    | DR17             | 2005        | P17               | F          | 20         |
|                    | DR21             | 2005        | P21               | F          | 69         |
|                    | DR22             | 2005        | P22               | M          | 31         |
|                    | DR26             | 2006        | P26               | M          | 22         |
|                    | DR35             | 2006        | P35               | F          | 51         |
|                    | DR39             | 2006        | P39               | F          | 32         |
|                    | DR40             | 2006        | P40               | F          | 37         |
|                    | DR43             | 2006        | P43               | M          | 46         |
|                    | DR46             | 2006        | P46               | M          | 64         |
|                    | DR47             | 2007        | P47               | M          | 67         |
|                    | DR62             | 2007        | P61               | F          | 17         |
| <b>Cluster 2</b>   | DR4              | 2004        | P4                | M          | 43         |
|                    | DR14             | 2005        | P14               | F          | 76         |
|                    | DR27             | 2006        | P27               | M          | 28         |
|                    | DR33             | 2006        | P33               | F          | 19         |
|                    | DR38             | 2006        | P38               | M          | 53         |
|                    | DR49             | 2007        | P49               | M          | 72         |
|                    | DR50             | 2007        | P35               | F          | 52         |
|                    | DR58             | 2007        | P57               | F          | 21         |
|                    | DR59             | 2007        | P58               | F          | 24         |
|                    | DR73             | 2008        | P72               | M          | 25         |
|                    | DR82             | 2008        | P80               | F          | 52         |
| <b>Cluster 3</b>   | DR24             | 2006        | P24               | F          | 72         |
|                    | DR25             | 2006        | P25               | M          | 33         |
|                    | DR65             | 2007        | P64               | M          | 50         |
|                    | DR66             | 2007        | P65               | F          | 61         |
|                    | DR78             | 2008        | P76               | M          | 32         |
| <b>Cluster 4</b>   | DR34             | 2006        | P34               | M          | 63         |
|                    | DR45             | 2006        | P45               | M          | 77         |
|                    | DR61             | 2007        | P60               | M          | 55         |
|                    | DR71             | 2008        | P70               | M          | 45         |

---

|                  |      |      |     |   |    |
|------------------|------|------|-----|---|----|
| <b>Cluster 5</b> | DR30 | 2006 | P30 | F | 30 |
|                  | DR89 | 2009 | P86 | M | 82 |

---

|                  |      |      |     |   |    |
|------------------|------|------|-----|---|----|
| <b>Cluster 6</b> | DR18 | 2005 | P18 | M | 35 |
|                  | DR19 | 2005 | P19 | M | 42 |

---

**Non-clustered  
strains**

|   |      |      |     |   |    |
|---|------|------|-----|---|----|
| \ | DR1  | 2003 | P1  | M | 72 |
| \ | DR2  | 2003 | P2  | M | 33 |
| \ | DR3  | 2004 | P3  | M | 54 |
| \ | DR6  | 2005 | P6  | F | 36 |
| \ | DR7  | 2005 | P7  | M | 62 |
| \ | DR9  | 2005 | P9  | M | 69 |
| \ | DR11 | 2005 | P11 | F | 32 |
| \ | DR12 | 2005 | P12 | M | 39 |
| \ | DR13 | 2005 | P13 | M | 64 |
| \ | DR15 | 2005 | P15 | M | 29 |
| \ | DR16 | 2005 | P16 | M | 76 |
| \ | DR20 | 2005 | P20 | M | 39 |
| \ | DR23 | 2006 | P23 | F | 42 |
| \ | DR28 | 2006 | P28 | M | 30 |
| \ | DR29 | 2006 | P29 | M | 60 |
| \ | DR31 | 2006 | P31 | M | 21 |
| \ | DR32 | 2006 | P32 | F | 18 |
| \ | DR36 | 2006 | P36 | F | 50 |
| \ | DR37 | 2006 | P37 | F | 52 |
| \ | DR41 | 2006 | P41 | M | 70 |
| \ | DR42 | 2006 | P42 | M | 59 |
| \ | DR44 | 2006 | P44 | M | 49 |
| \ | DR48 | 2007 | P48 | M | 26 |
| \ | DR51 | 2007 | P50 | M | 74 |
| \ | DR52 | 2007 | P51 | M | 53 |
| \ | DR53 | 2007 | P52 | M | 64 |
| \ | DR54 | 2007 | P53 | F | 15 |
| \ | DR55 | 2007 | P54 | M | 62 |
| \ | DR56 | 2007 | P55 | M | 16 |
| \ | DR57 | 2007 | P56 | M | 47 |
| \ | DR60 | 2007 | P59 | M | 63 |
| \ | DR63 | 2007 | P62 | F | 26 |
| \ | DR64 | 2007 | P63 | F | 48 |
| \ | DR67 | 2007 | P66 | F | 24 |
| \ | DR68 | 2007 | P67 | M | 53 |

|   |      |      |     |   |    |
|---|------|------|-----|---|----|
| \ | DR69 | 2008 | P68 | M | 39 |
| \ | DR70 | 2008 | P69 | M | 73 |
| \ | DR72 | 2008 | P71 | F | 23 |
| \ | DR74 | 2008 | P73 | M | 63 |
| \ | DR75 | 2008 | P66 | F | 25 |
| \ | DR76 | 2008 | P74 | M | 56 |
| \ | DR77 | 2008 | P75 | M | 65 |
| \ | DR79 | 2008 | P77 | F | 38 |
| \ | DR80 | 2008 | P78 | M | 70 |
| \ | DR81 | 2008 | P79 | F | 57 |
| \ | DR83 | 2008 | P59 | M | 64 |
| \ | DR84 | 2008 | P81 | F | 50 |
| \ | DR85 | 2008 | P82 | F | 45 |
| \ | DR86 | 2008 | P83 | F | 20 |
| \ | DR87 | 2008 | P84 | M | 51 |
| \ | DR88 | 2009 | P85 | M | 21 |
| \ | DR90 | 2009 | P87 | M | 58 |
| \ | DR91 | 2009 | P88 | M | 27 |
| \ | DR92 | 2009 | P89 | F | 30 |
| \ | DR93 | 2009 | P72 | M | 26 |
| \ | DR94 | 2009 | P76 | M | 33 |
| \ | DR95 | 2009 | P90 | M | 32 |

---
